# Supplementary material for: Diagnostic Performance of Automated MRI Volumetry by icobrain dm for Alzheimer’s Disease in a Clinical Setting: A REMEMBER Study
Source: PubMed Central journal article supplement — J Alzheimers Dis. 2021 Sep 14;83(2):623–39. doi: 10.3233/JAD-210450 (PMC8543261; doi:10.3233/jad-210450), 2021-09-14
Supplement: jad-83-jad210450-s001.pdf [file jad-83-jad210450-s001.pdf]

# Supplementary Material

## Diagnostic Performance of Automated MRI Volumetry by icobrain dm for Alzheimer's Disease in a Clinical Setting: A REMEMBER Study

**Supplementary Table 1.** Description on scanner field and model specifications. Magnet strength in Tesla (T) (**Field**) and number of subjects (#) were reported.

| <i>Vendor</i>             | <i>Model</i> | <i>Field (T)</i> | <i>#</i> |
|---------------------------|--------------|------------------|----------|
| <b>GE medical systems</b> | Sigma        | 1.5              | 80       |
| <b>GE medical systems</b> | Discovery    | 3.0              | 42       |
| <b>Philips</b>            | Achieva      | 1.5              | 124      |
| <b>Philips</b>            | Intera       | 1.5              | 92       |
| <b>Philips</b>            | Achieva      | 3.0              | 47       |
| <b>Philips</b>            | Intera       | 3.0              | 24       |
| <b>Siemens</b>            | Aera         | 1.5              | 10       |
| <b>Siemens</b>            | Avanto       | 1.5              | 44       |
| <b>Siemens</b>            | Symphony     | 1.5              | 63       |
| <b>Siemens</b>            | Allegra      | 3.0              | 100      |
| <b>Siemens</b>            | TrioTrim     | 3.0              | 123      |
| <b>Siemens</b>            | Skyra        | 3.0              | 21       |
| <b>Siemens</b>            | Prisma       | 3.0              | 50       |

**Supplementary Table 2.** Exploratory study: Disease stage group division according to slice thickness resolution.

| <b>Resolution</b>                  | <b>HC-SCD</b> | <b>MCI</b> | <b>ADD</b> |
|------------------------------------|---------------|------------|------------|
| <b>High (ST &lt; 1 mm)</b>         | 81            | 172        | 145        |
| <b>Middle (1 mm ≤ ST ≤ 1.6 mm)</b> | 99            | 151        | 110        |
| <b>Low ( ST &gt; 1.6 mm)</b>       | 9             | 51         | 56         |

Subjects were split into three groups according to T1 image resolution. ST, slice thickness; HC, cognitively healthy controls; SCD, subjective cognitive decline; MCI, mild cognitive impairment; ADD, Alzheimer's disease dementia. High resolution (High, ST < 1 mm), middle resolution (Middle, 1 mm ≤ ST ≤ 1.6 mm), and low resolution images (Low, ST > 1.6 mm). The cognitively healthy controls and subjective cognitive decline subjects were taken together as a diagnostic group due to the low number of low resolution images available.

**Supplementary Table 3.** Exploratory study: icobrain dm’s diagnostic performance regarding differences in slice thickness resolution.

| <b>Resolution</b>                  | <b>HC-SCD versus MCI</b><br>AUC [95% CI] | <b>HC-SCD versus ADD</b><br>AUC [95% CI] | <b>MCI versus ADD</b><br>AUC [95% CI] |
|------------------------------------|------------------------------------------|------------------------------------------|---------------------------------------|
| <b>High (ST &lt; 1 mm)</b>         | 0.741 [0.735-0.747]                      | 0.865 [0.852-0.877]                      | 0.629 [0.615-0.643]                   |
| <b>Middle (1 mm ≤ ST ≤ 1.6 mm)</b> | 0.757 [0.746-0.769]                      | 0.895 [0.889-0.900]                      | 0.677 [0.663-0.690]                   |
| <b>Low (ST &gt; 1.6 mm)</b>        | 0.731 [0.716-0.747]                      | 0.666 [0.644-0.687]                      | 0.539 [0.529-0.551]                   |

ST, slice thickness; HC, cognitively healthy controls; SCD, subjective cognitive decline; MCI, mild cognitive impairment; ADD, Alzheimer’s disease dementia. For estimating the AUC (area under the curve) distribution, a 50 repetition bootstrap resampling procedure was performed over the training set (the high ST resolution group) and the fitted models were evaluated over the 2 testing sets (the middle and low ST resolution groups). Data reported as mean and 95% AUC confidence intervals. Model input: whole brain, gray matter, cortical gray matter, white matter, left hippocampus, right hippocampus, frontal, parietal, temporal, and occipital cortices.

**Supplementary Figure 1.** Exploratory study: Effect of slice thickness resolution on diagnostic performance of icobrain dm

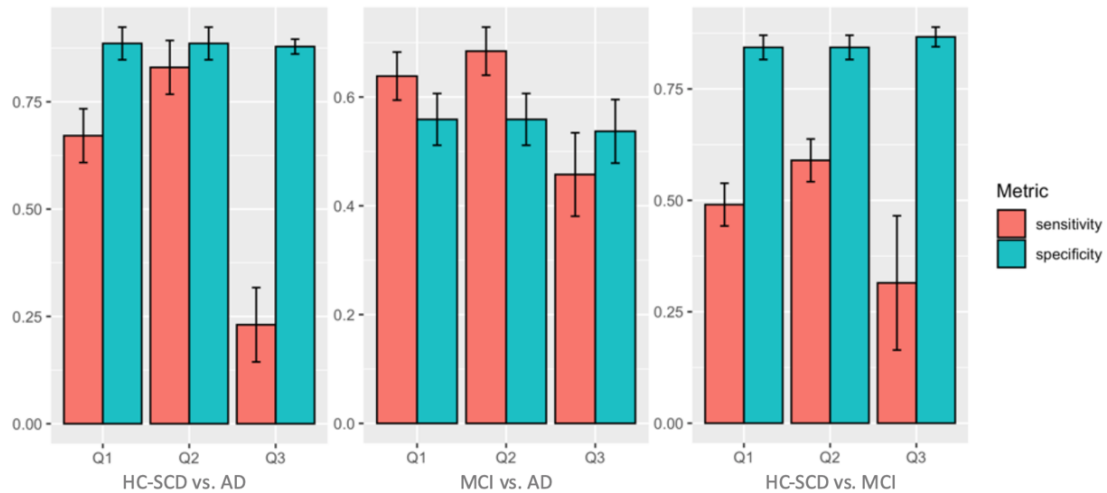

Resolution model performance for classification between AD stages. ST, slice thickness; HC, cognitively healthy controls; SCD, subjective cognitive decline; MCI, mild cognitive impairment; AD, Alzheimer's disease dementia. Sensitivity (red) and specificity (blue) were reported for high resolution (Q1,  $ST < 1$  mm), middle resolution (Q2,  $1 \text{ mm} \leq ST \leq 1.6$  mm), and low resolution (Q3,  $ST > 1.6$  mm) pairwise comparisons. Model input: whole brain, gray matter, cortical gray matter, white matter, left hippocampus, right hippocampus, frontal, parietal, temporal, and occipital cortices.

Supplementary Figure 2. Correlations between icobrain dm and FreeSurfer brain volumes

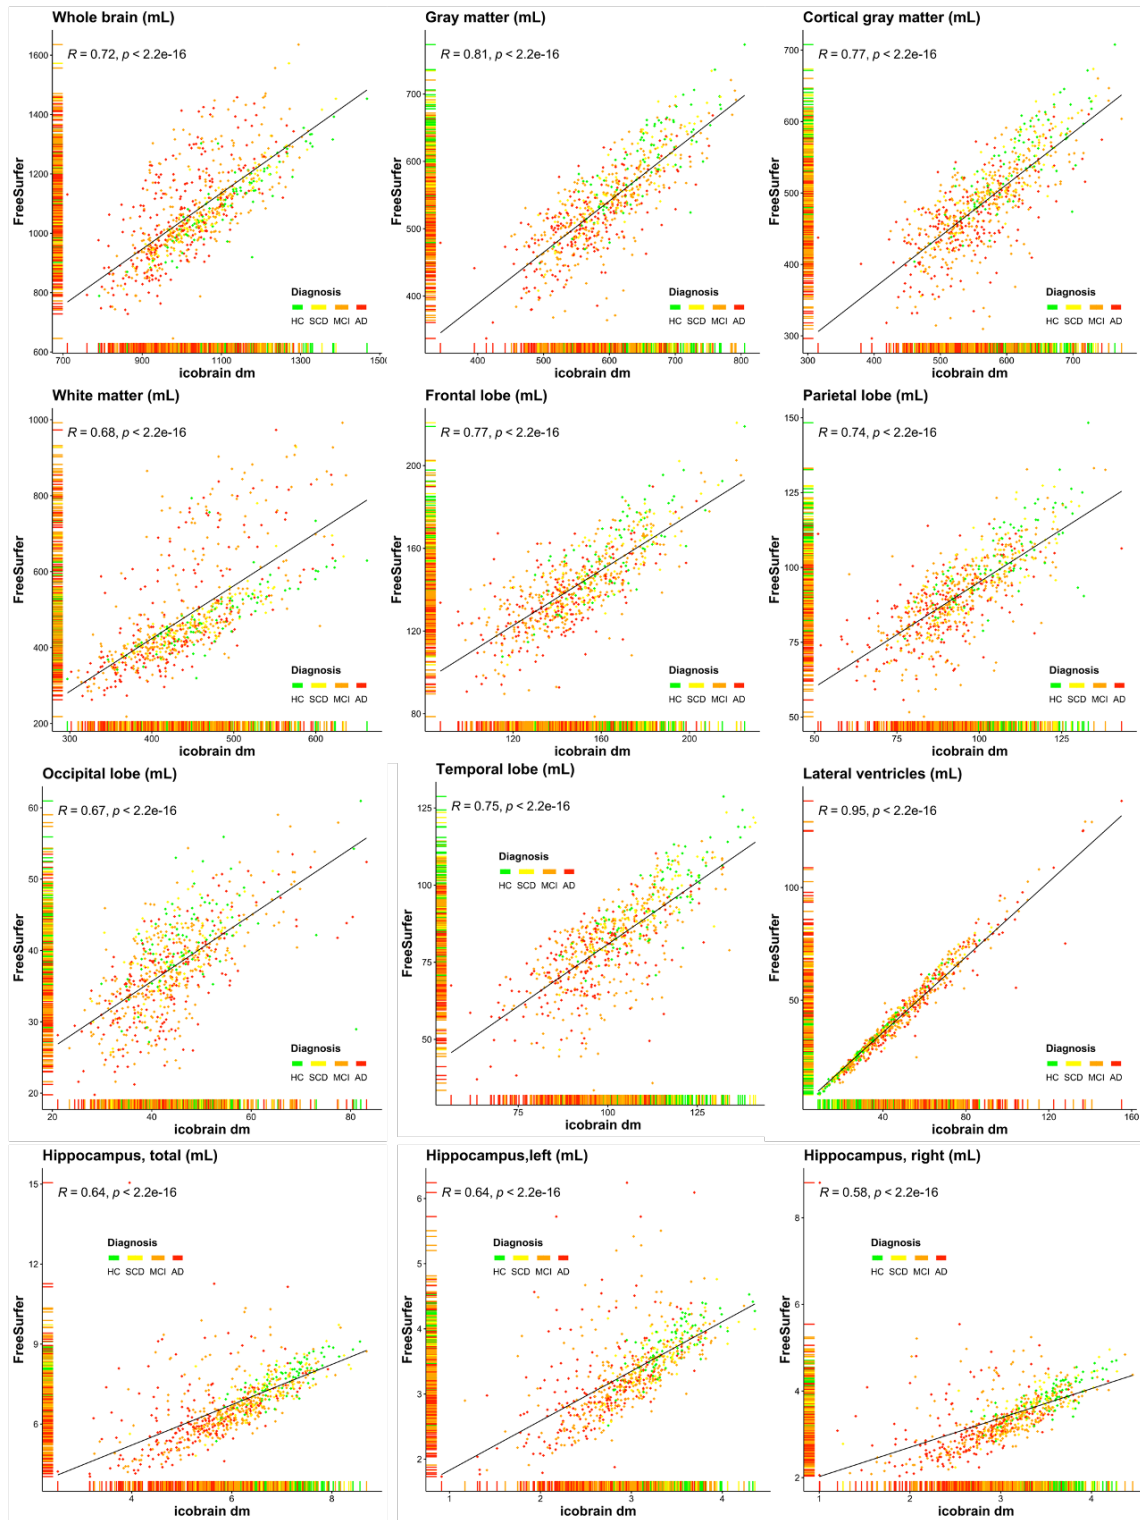

Regional brain volumes are presented in milliliter (mL). Cognitively healthy controls (HC) are depicted in green. Subjective cognitive decline subjects (SCD) are depicted in yellow. Mild cognitive impairment (MCI) patients are depicted in orange. Alzheimer's disease dementia (AD) patients are depicted in red. R, Pearson's correlation coefficient.  $p$ ,  $p$  value.

**Supplementary Table 4.** Effect of segmentation technique on brain structure volume calculation

| <b>Brain structures</b>       | <b>Estimate</b> | <b>Std. error</b> | <b>z-value</b> | <b>Adjusted p (Bonferroni)</b> |
|-------------------------------|-----------------|-------------------|----------------|--------------------------------|
| <b>Whole brain</b>            |                 |                   |                |                                |
| FreeSurfer – icobrain dm == 0 | 44.673          | 5.936             | 7.525          | <0.001                         |
| <b>Gray matter</b>            |                 |                   |                |                                |
| FreeSurfer – icobrain dm == 0 | -61.140         | 3.034             | -20.15         | <0.001                         |
| <b>Cortical gray matter</b>   |                 |                   |                |                                |
| FreeSurfer – icobrain dm == 0 | -83.665         | 2.942             | -28.44         | <0.001                         |
| <b>White matter</b>           |                 |                   |                |                                |
| FreeSurfer – icobrain dm == 0 | 56.134          | 4.979             | 11.28          | <0.001                         |
| <b>Frontal cortex</b>         |                 |                   |                |                                |
| FreeSurfer – icobrain dm == 0 | -7.7290         | 0.9787            | -7.897         | <0.001                         |
| <b>Parietal cortex</b>        |                 |                   |                |                                |
| FreeSurfer – icobrain dm == 0 | -3.3545         | 0.6338            | -5.293         | <0.001                         |
| <b>Temporal cortex</b>        |                 |                   |                |                                |
| FreeSurfer – icobrain dm == 0 | -20.592         | 0.6374            | -32.30         | <0.001                         |
| <b>Occipital cortex</b>       |                 |                   |                |                                |
| FreeSurfer – icobrain dm == 0 | -6.6748         | 0.3848            | -17.35         | <0.001                         |
| <b>Hippocampus, total</b>     |                 |                   |                |                                |
| FreeSurfer – icobrain dm == 0 | 0.84136         | 0.05225           | 16.10          | <0.001                         |
| <b>Hippocampus, left</b>      |                 |                   |                |                                |
| FreeSurfer – icobrain dm == 0 | 0.42075         | 0.02677           | 15.71          | <0.001                         |
| <b>Hippocampus, right</b>     |                 |                   |                |                                |
| FreeSurfer – icobrain dm == 0 | 0.42061         | 0.02869           | 14.66          | <0.001                         |
| <b>Lateral ventricles</b>     |                 |                   |                |                                |
| FreeSurfer – icobrain dm == 0 | -6.1584         | 0.9256            | -6.653         | <0.001                         |

**Supplementary Table 5.** Diagnostic performance of icobrain dm for all pairwise comparisons

| icobrain dm               | versus SCD |                 |                 |            | versus MCI |                 |                 |            | versus ADD |                 |                 |            |       |       |
|---------------------------|------------|-----------------|-----------------|------------|------------|-----------------|-----------------|------------|------------|-----------------|-----------------|------------|-------|-------|
|                           | AUC        | Specificity (%) | Sensitivity (%) | Threshold* | AUC        | Specificity (%) | Sensitivity (%) | Threshold* | AUC        | Specificity (%) | Sensitivity (%) | Threshold* |       |       |
| <b>WB</b>                 | HC         | 0.644           | 65.2            | 62.9       | 0.497      | 0.720           | 65.2            | 72.8       | 0.759      | <b>0.749</b>    | 65.2            | 75.6       | 0.697 |       |
|                           | SCD        |                 |                 |            |            | 0.569           | 24.7            | 89.1       | 0.733      |                 | 0.615           | 91.0       | 26.8  | 0.798 |
|                           | MCI        |                 |                 |            |            |                 |                 |            |            |                 | 0.548           | 79.1       | 31.6  | 0.460 |
| <b>GM</b>                 | HC         | 0.623           | 75.0            | 52.3       | 0.524      | 0.661           | 86.4            | 48.2       | 0.814      | <b>0.726</b>    | 86.4            | 57.4       | 0.729 |       |
|                           | SCD        |                 |                 |            |            | 0.558           | 90.9            | 24.6       | 0.813      |                 | 0.634           | 84.1       | 44.1  | 0.742 |
|                           | MCI        |                 |                 |            |            |                 |                 |            |            |                 | 0.573           | 69.7       | 44.1  | 0.413 |
| <b>CGM</b>                | HC         | 0.601           | 89.8            | 32.9       | 0.560      | 0.639           | 89.8            | 40.3       | 0.823      | <b>0.686</b>    | 89.8            | 49.0       | 0.749 |       |
|                           | SCD        |                 |                 |            |            | 0.540           | 89.8            | 20.5       | 0.809      |                 | 0.597           | 85.3       | 33.8  | 0.743 |
|                           | MCI        |                 |                 |            |            |                 |                 |            |            |                 | 0.555           | 72.9       | 39.7  | 0.411 |
| <b>WM</b>                 | HC         | 0.562           | 56.8            | 58.0       | 0.504      | 0.582           | 75.0            | 44.5       | 0.795      | <b>0.562</b>    | 75.0            | 44.1       | 0.709 |       |
|                           | SCD        |                 |                 |            |            | 0.530           | 75.0            | 36.0       | 0.787      |                 | 0.484           | 96.5       | 13.7  | 0.700 |
|                           | MCI        |                 |                 |            |            |                 |                 |            |            |                 | 0.512           | 63.4       | 45.6  | 0.393 |
| <b>Frontal cortex</b>     | HC         | 0.505           | 79.5            | 33.0       | 0.492      | 0.631           | 85.2            | 45.4       | 0.805      | <b>0.685</b>    | 82.9            | 51.5       | 0.721 |       |
|                           | SCD        |                 |                 |            |            | 0.614           | 77.2            | 45.1       | 0.806      |                 | 0.664           | 53.4       | 73.0  | 0.664 |
|                           | MCI        |                 |                 |            |            |                 |                 |            |            |                 | 0.543           | 32.2       | 80.0  | 0.361 |
| <b>Parietal cortex</b>    | HC         | 0.612           | 63.6            | 57.9       | 0.515      | 0.661           | 88.6            | 43.5       | 0.831      | <b>0.725</b>    | 88.6            | 50.0       | 0.758 |       |
|                           | SCD        |                 |                 |            |            | 0.554           | 90.9            | 22.1       | 0.816      |                 | 0.630           | 90.9       | 33.8  | 0.766 |
|                           | MCI        |                 |                 |            |            |                 |                 |            |            |                 | 0.578           | 73.2       | 40.2  | 0.422 |
| <b>Occipital cortex</b>   | HC         | 0.433           | 50.0            | 51.1       | 0.508      | 0.455           | 53.4            | 51.4       | 0.786      | <b>0.464</b>    | 70.4            | 32.8       | 0.693 |       |
|                           | SCD        |                 |                 |            |            | 0.526           | 85.2            | 29.6       | 0.797      |                 | 0.471           | 78.4       | 28.4  | 0.671 |
|                           | MCI        |                 |                 |            |            |                 |                 |            |            |                 | 0.495           | 44.4       | 61.3  | 0.393 |
| <b>Temporal cortex</b>    | HC         | 0.586           | 86.4            | 34.1       | 0.551      | 0.732           | 60.3            | 74.8       | 0.743      | <b>0.790</b>    | 65.9            | 78.0       | 0.640 |       |
|                           | SCD        |                 |                 |            |            | 0.628           | 45.5            | 78.3       | 0.737      |                 | 0.706           | 90.9       | 40.2  | 0.797 |
|                           | MCI        |                 |                 |            |            |                 |                 |            |            |                 | 0.600           | 83.3       | 36.8  | 0.452 |
| <b>Lateral ventricles</b> | HC         | 0.579           | 63.6            | 55.7       | 0.490      | 0.666           | 62.5            | 67.5       | 0.749      | <b>0.763</b>    | 65.9            | 77.4       | 0.610 |       |
|                           | SCD        |                 |                 |            |            | 0.587           | 53.4            | 63.4       | 0.764      |                 | 0.680           | 59.1       | 70.6  | 0.647 |

|                           |       |      |      |       |       |      |      |       |              |      |       |       |
|---------------------------|-------|------|------|-------|-------|------|------|-------|--------------|------|-------|-------|
| MCI                       |       |      |      |       |       |      |      | 0.598 | 54.3         | 62.7 | 0.371 |       |
| <b>Hippocampus, total</b> |       |      |      |       |       |      |      |       |              |      |       |       |
| HC                        | 0.608 | 65.9 | 54.5 | 0.511 | 0.753 | 85.3 | 59.0 | 0.815 | <b>0.871</b> | 89.8 | 72.5  | 0.736 |
| SCD                       |       |      |      |       | 0.667 | 78.4 | 51.0 | 0.802 | 0.802        | 78.4 | 71.6  | 0.682 |
| MCI                       |       |      |      |       |       |      |      |       | 0.646        | 69.1 | 53.4  | 0.414 |
| <b>Hippocampus, left</b>  |       |      |      |       |       |      |      |       |              |      |       |       |
| HC                        | 0.591 | 72.7 | 45.5 | 0.527 | 0.737 | 87.5 | 52.4 | 0.831 | <b>0.849</b> | 97.7 | 58.3  | 0.836 |
| SCD                       |       |      |      |       | 0.660 | 80.6 | 47.6 | 0.810 | 0.788        | 80.7 | 65.2  | 0.710 |
| MCI                       |       |      |      |       |       |      |      |       | 0.633        | 66.6 | 54.9  | 0.400 |
| <b>Hippocampus, right</b> |       |      |      |       |       |      |      |       |              |      |       |       |
| HC                        | 0.607 | 47.7 | 70.5 | 0.475 | 0.748 | 79.5 | 61.8 | 0.800 | <b>0.862</b> | 84.1 | 75.5  | 0.703 |
| SCD                       |       |      |      |       | 0.660 | 62.5 | 68.5 | 0.765 | 0.794        | 83.0 | 65.2  | 0.719 |
| MCI                       |       |      |      |       |       |      |      |       | 0.649        | 51.4 | 72.0  | 0.350 |

Area under the curve (AUC), specificity and sensitivity values were documented for each of the pairwise comparisons between disease stages (SCD versus HC, MCI versus HC, ADD versus HC, ADD versus SCD and ADD versus MCI). Specificity (%) and sensitivity (%) outcomes were calculated based on the combined smallest Euclidian distance, using the Youden index to determine the threshold\* for each disease stage comparison. AUC values for HC versus ADD are highlighted in bold. HC, cognitively healthy controls; SCD, subjective cognitive decline; MCI, mild cognitive impairment; ADD, Alzheimer's disease dementia; WB, whole brain; GM, gray matter; CGM, cortical gray matter; WM, white matter.



**Supplementary Table 6.** Diagnostic performance of FreeSurfer for all pairwise comparisons

| FreeSurfer                | versus SCD |                 |                 |            | versus MCI |                 |                 |            | versus ADD |                 |                 |            |       |
|---------------------------|------------|-----------------|-----------------|------------|------------|-----------------|-----------------|------------|------------|-----------------|-----------------|------------|-------|
|                           | AUC        | Specificity (%) | Sensitivity (%) | Threshold* | AUC        | Specificity (%) | Sensitivity (%) | Threshold* | AUC        | Specificity (%) | Sensitivity (%) | Threshold* |       |
| <b>WB</b>                 | HC         | 0.596           | 83.1            | 42.7       | 0.515      | 0.561           | 83.1            | 41.7       | 0.790      | <b>0.564</b>    | 83.1            | 45.6       | 0.745 |
|                           | SCD        |                 |                 |            |            | 0.514           | 71.9            | 39.8       | 0.786      | 0.503           | 86.5            | 34.8       | 0.734 |
|                           | MCI        |                 |                 |            |            |                 |                 |            |            | 0.501           | 68.8            | 39.2       | 0.438 |
| <b>GM</b>                 | HC         | 0.515           | 95.5            | 18.2       | 0.548      | 0.613           | 73.8            | 49.5       | 0.789      | <b>0.705</b>    | 73.9            | 63.7       | 0.699 |
|                           | SCD        |                 |                 |            |            | 0.621           | 93.2            | 27.4       | 0.843      | 0.703           | 69.3            | 61.3       | 0.718 |
|                           | MCI        |                 |                 |            |            |                 |                 |            |            | 0.578           | 50.5            | 65.7       | 0.382 |
| <b>CGM</b>                | HC         | 0.509           | 93.2            | 21.6       | 0.535      | 0.607           | 85.2            | 36.9       | 0.804      | <b>0.695</b>    | 86.4            | 49.5       | 0.733 |
|                           | SCD        |                 |                 |            |            | 0.610           | 90.9            | 27.7       | 0.838      | 0.692           | 73.9            | 53.9       | 0.730 |
|                           | MCI        |                 |                 |            |            |                 |                 |            |            | 0.576           | 60.3            | 55.9       | 0.390 |
| <b>WM</b>                 | HC         | 0.591           | 56.8            | 58.0       | 0.491      | 0.453           | 61.4            | 45.1       | 0.764      | <b>0.486</b>    | 92.0            | 23.0       | 0.652 |
|                           | SCD        |                 |                 |            |            | 0.525           | 64.8            | 49.5       | 0.772      | 0.548           | 97.8            | 27.5       | 0.678 |
|                           | MCI        |                 |                 |            |            |                 |                 |            |            | 0.539           | 89.3            | 24.5       | 0.403 |
| <b>Frontal cortex</b>     | HC         | 0.525           | 62.5            | 50.0       | 0.500      | 0.575           | 92.0            | 26.8       | 0.807      | <b>0.637</b>    | 88.6            | 35.8       | 0.736 |
|                           | SCD        |                 |                 |            |            | 0.596           | 47.7            | 67.8       | 0.771      | 0.651           | 55.7            | 67.6       | 0.689 |
|                           | MCI        |                 |                 |            |            |                 |                 |            |            | 0.554           | 45.1            | 65.7       | 0.384 |
| <b>Parietal cortex</b>    | HC         | 0.530           | 93.2            | 22.7       | 0.483      | 0.604           | 84.1            | 42.9       | 0.803      | <b>0.670</b>    | 81.8            | 52.9       | 0.773 |
|                           | SCD        |                 |                 |            |            | 0.574           | 70.5            | 42.9       | 0.805      | 0.627           | 68.2            | 54.1       | 0.721 |
|                           | MCI        |                 |                 |            |            |                 |                 |            |            | 0.554           | 70.3            | 43.6       | 0.401 |
| <b>Occipital cortex</b>   | HC         | 0.502           | 18.2            | 90.9       | 0.489      | 0.555           | 70.5            | 41.3       | 0.792      | <b>0.557</b>    | 78.5            | 35.3       | 0.719 |
|                           | SCD        |                 |                 |            |            | 0.549           | 90.9            | 26.2       | 0.809      | 0.565           | 88.6            | 30.8       | 0.732 |
|                           | MCI        |                 |                 |            |            |                 |                 |            |            | 0.512           | 71.0            | 33.8       | 0.395 |
| <b>Temporal cortex</b>    | HC         | 0.528           | 84.1            | 28.4       | 0.527      | 0.675           | 72.7            | 57.4       | 0.781      | <b>0.759</b>    | 76.1            | 70.1       | 0.685 |
|                           | SCD        |                 |                 |            |            | 0.691           | 68.1            | 61.8       | 0.781      | 0.707           | 73.9            | 71.0       | 0.694 |
|                           | MCI        |                 |                 |            |            |                 |                 |            |            | 0.585           | 48.6            | 69.6       | 0.371 |
| <b>Lateral ventricles</b> | HC         | 0.597           | 84.1            | 36.4       | 0.554      | 0.636           | 63.6            | 59.3       | 0.767      | <b>0.733</b>    | 65.9            | 71.6       | 0.646 |
|                           | SCD        |                 |                 |            |            | 0.539           | 42.0            | 67.8       | 0.770      | 0.633           | 51.1            | 71.6       | 0.649 |

|                           |       |      |      |       |       |      |      |       |              |       |      |       |       |
|---------------------------|-------|------|------|-------|-------|------|------|-------|--------------|-------|------|-------|-------|
| MCI                       |       |      |      |       |       |      |      |       |              | 0.596 | 47.6 | 68.6  | 0.362 |
| <b>Hippocampus, total</b> |       |      |      |       |       |      |      |       |              |       |      |       |       |
| HC                        | 0.537 | 48.9 | 64.8 | 0.500 | 0.656 | 85.2 | 47.6 | 0.804 | <b>0.711</b> | 87.5  | 56.9 | 0.725 |       |
| SCD                       |       |      |      |       | 0.625 | 71.6 | 54.3 | 0.799 | 0.688        | 85.2  | 52.0 | 0.742 |       |
| MCI                       |       |      |      |       |       |      |      |       | 0.574        | 66.6  | 52.0 | 0.403 |       |
| <b>Hippocampus, left</b>  |       |      |      |       |       |      |      |       |              |       |      |       |       |
| HC                        | 0.538 | 67.0 | 48.9 | 0.494 | 0.647 | 76.1 | 55.5 | 0.791 | <b>0.696</b> | 87.5  | 54.9 | 0.723 |       |
| SCD                       |       |      |      |       | 0.616 | 78.4 | 47.0 | 0.806 | 0.671        | 78.4  | 57.4 | 0.721 |       |
| MCI                       |       |      |      |       |       |      |      |       | 0.563        | 70.9  | 47.0 | 0.400 |       |
| <b>Hippocampus, right</b> |       |      |      |       |       |      |      |       |              |       |      |       |       |
| HC                        | 0.526 | 89.8 | 21.6 | 0.485 | 0.660 | 80.6 | 50.8 | 0.799 | <b>0.732</b> | 89.8  | 55.9 | 0.735 |       |
| SCD                       |       |      |      |       | 0.637 | 68.2 | 58.7 | 0.793 | 0.710        | 77.3  | 61.3 | 0.723 |       |
| MCI                       |       |      |      |       |       |      |      |       | 0.588        | 72.6  | 45.1 | 0.416 |       |

Area under the curve (AUC), specificity and sensitivity values were documented for each of the pairwise comparisons between disease stages (SCD versus HC, MCI versus HC, ADD versus HC, ADD versus SCD and ADD versus MCI). Specificity (%) and sensitivity (%) outcomes were calculated based on the combined smallest Euclidian distance, using the Youden index to determine the threshold\* for each disease stage comparison. AUC values for HC versus ADD are highlighted in bold. WB, whole brain; GM, gray matter; CGM, cortical gray matter; WM, white matter.

**Supplementary Figure 3. Violin boxplots per brain region – FreeSurfer.**

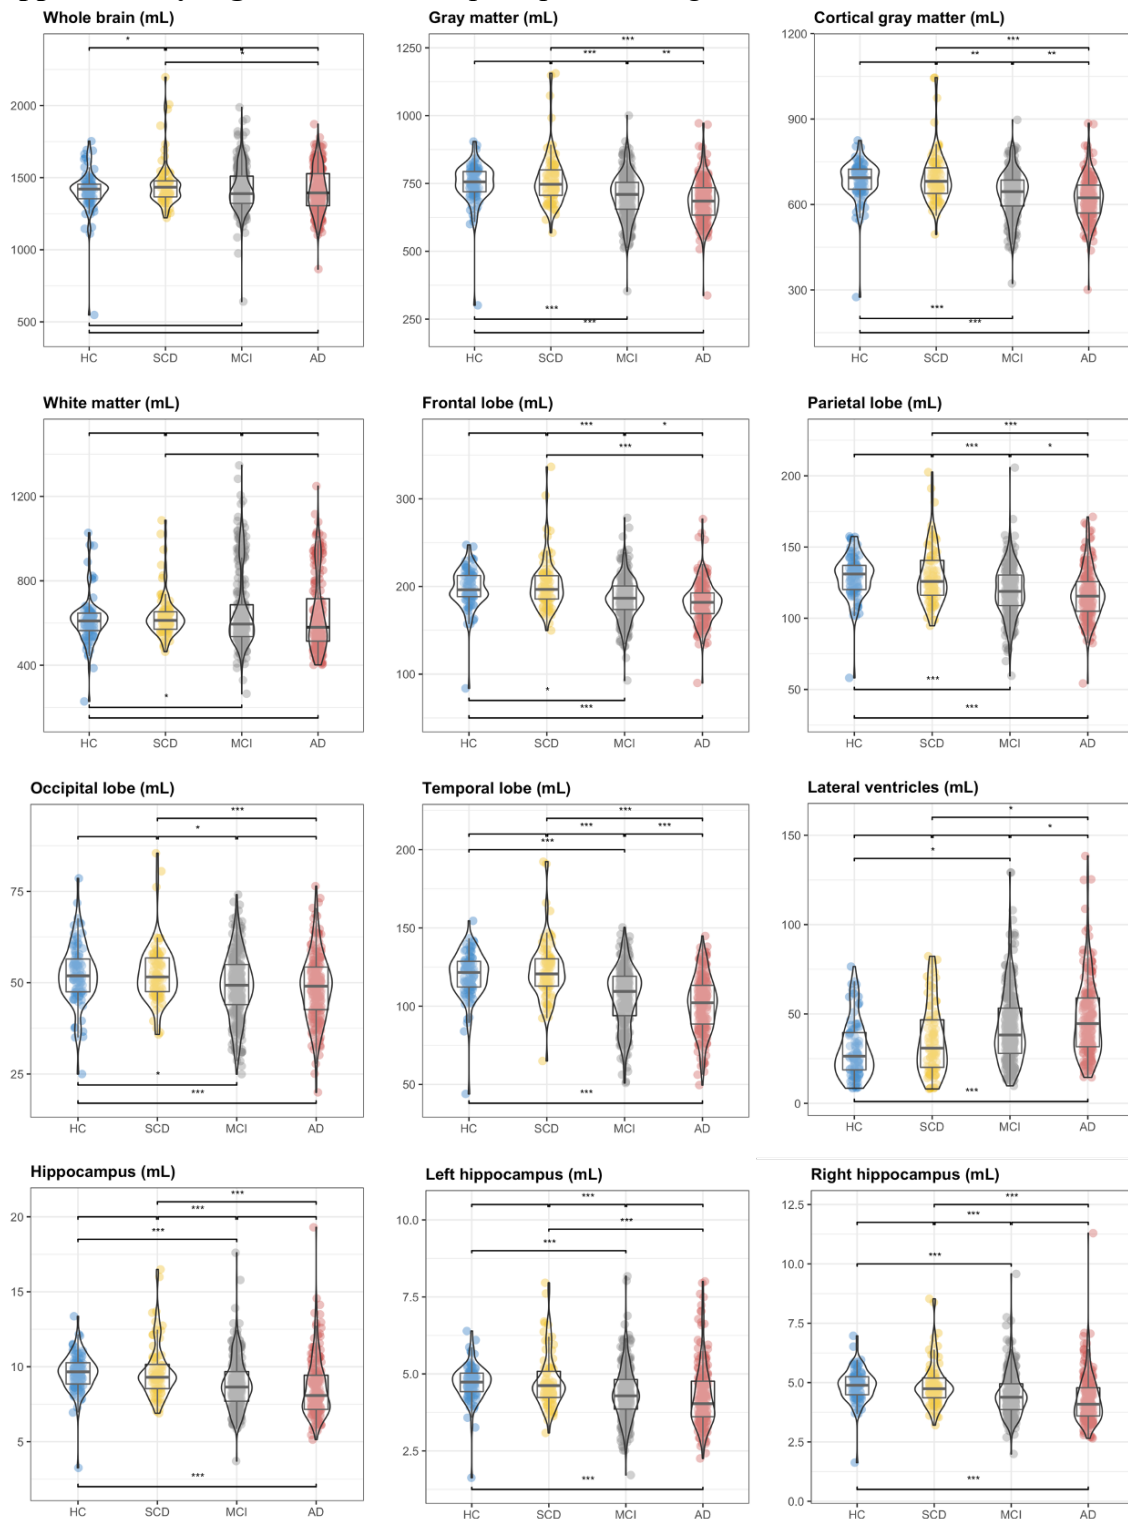

Differences between groups reported using post-hoc analysis (“Tukey” correction) for normalized brain volumes.  $p$  values: 0 “\*\*\*” < 0.001 “\*\*” < 0.01 “\*” < 0.05. The absence of a notation corresponds with a non-significant value. HC, cognitively healthy controls. SCD, subjective cognitive decline; MCI, mild cognitive impairment; AD, Alzheimer’s disease dementia.

**Supplementary Table 7.** Stepwise backward regression model – FreeSurfer for age- and sex-adjusted brain volumes normalized for head size.

| FreeSurfer            |                                               |       |              |        |              |           |                 |                 |       |
|-----------------------|-----------------------------------------------|-------|--------------|--------|--------------|-----------|-----------------|-----------------|-------|
| Disease Stage         | Final Brain Structures                        | AIC   | $\Delta$ AIC | REL.LL | Youden Index | Threshold | Specificity (%) | Sensitivity (%) | AUC   |
| <b>SCD versus HC</b>  | <b>WB</b> and LVENT                           | 235.3 | 6.57         | 0.04   | 0.284        | 0.482     | 63.6            | 64.8            | 0.679 |
| <b>MCI versus HC</b>  | <b>WB, FL, TL,</b><br>HIP-L and LVENT         | 375.8 | 2.84         | 0.24   | 0.448        | 0.834     | 90.9            | 53.9            | 0.761 |
| <b>ADD versus HC</b>  | <b>WB, FL, TL,</b><br><b>HIP-R,</b> and LVENT | 275.3 | 3.88         | 0.14   | 0.577        | 0.743     | 88.6            | 69.1            | 0.844 |
| <b>MCI versus SCD</b> | PL, TL, and <b>HIP-L</b>                      | 384.3 | 6.25         | 0.04   | 0.335        | 0.815     | 79.5            | 53.9            | 0.713 |
| <b>ADD versus SCD</b> | PL, TL, and <b>HIP-R</b>                      | 288.7 | 6.06         | 0.05   | 0.480        | 0.695     | 75.0            | 73.0            | 0.802 |
| <b>ADD versus MCI</b> | <b>PL, TL, HIP-R</b> and<br><b>LVENT</b>      | 683.2 | 2.97         | 0.23   | 0.213        | 0.394     | 62.5            | 58.8            | 0.622 |

Input brain volumes: whole brain (WB), frontal cortex (FL), parietal cortex (PL), temporal cortex (TL), lateral ventricles (LVENT), left hippocampus (HIP-L), and right hippocampus (HIP-R). Disease stages: HC, cognitively healthy controls; SCD, subjective cognitive decline; MCI, mild cognitive impairment; ADD, Alzheimer’s disease dementia. AIC, Akaike Information Criterion;  $\Delta$ -AIC, Difference between the AIC of the full model (input brain volumes) and the final model (brain volume model with the lowest AIC); REL.LL, relative likelihood measure; AUC, Area under the curve, specificity (%), and sensitivity (%) values were reported. Specificity and sensitivity outcomes are presented as percentages and were calculated based on the combined smallest Euclidian distance, using the Youden index to determine the threshold. Brain structures highlighted in bold are present in the final models of both automated volumetric tools.

**Supplementary Table 8.** Stepwise backward regression model: contribution of separate brain volumes– icobrain dm.

| <b>Disease Stage Comparison</b> | <b>Initial Model</b> | <b>VIF</b>   | <b>VIF-2</b> | <b>VIF-3</b> | <b>Start Model</b>             | <b>Final Model</b>               | <b>Stepwise AIC</b> |
|---------------------------------|----------------------|--------------|--------------|--------------|--------------------------------|----------------------------------|---------------------|
| <b>SCD versus HC</b>            | Whole brain          | 2.19         | 1.85         | 1.79         | Whole brain                    | Whole brain                      | 239.29              |
|                                 | Gray matter          | <b>46.04</b> | <b>5.57</b>  |              |                                |                                  |                     |
|                                 | Cortical gray matter | <b>52.21</b> |              |              |                                |                                  |                     |
|                                 | Frontal cortex       | 2.83         | 2.84         | 2.06         | Frontal cortex                 | Frontal cortex                   | 236.38              |
|                                 | Parietal cortex      | 2.77         | 2.77         | 1.88         | Parietal cortex                | Parietal cortex                  | 236.33              |
|                                 | Temporal cortex      | 2.13         | 2.06         | 1.75         | Temporal cortex                |                                  |                     |
|                                 | Hippocampus, right   | 1.70         | 1.69         | 1.68         | Hippocampus, right             | Hippocampus, right               | 234.56              |
|                                 | Hippocampus, left    | 1.70         | 1.71         | 1.67         | Hippocampus, left              |                                  |                     |
|                                 | Lateral ventricles   | 2.17         | 1.40         | 1.40         | Lateral ventricles             |                                  |                     |
|                                 |                      |              |              |              | <b>AIC<sub>i</sub>: 239.05</b> | <b>AIC<sub>min</sub>: 233.71</b> |                     |
| <b>MCI versus HC</b>            | Whole brain          | 1.78         | 1.43         | 1.35         | Whole brain                    | Whole brain                      | 352.81              |
|                                 | Gray matter          | <b>52.29</b> | <b>5.39</b>  |              |                                |                                  |                     |
|                                 | Cortical gray matter | <b>57.00</b> |              |              |                                |                                  |                     |
|                                 | Frontal cortex       | 3.27         | 3.07         | 1.74         | Frontal cortex                 |                                  |                     |
|                                 | Parietal cortex      | 2.31         | 2.27         | 1.69         | Parietal cortex                | Parietal cortex                  | 343.27              |
|                                 | Temporal cortex      | 1.68         | 1.66         | 1.39         | Temporal cortex                | Temporal cortex                  | 344.99              |
|                                 | Hippocampus, right   | 2.01         | 2.00         | 1.95         | Hippocampus, right             | Hippocampus, right               | 363.39              |
|                                 | Hippocampus, left    | 2.03         | 1.96         | 1.95         | Hippocampus, left              |                                  |                     |
|                                 | Lateral ventricles   | 2.08         | 1.36         | 1.34         | Lateral ventricles             |                                  |                     |
|                                 |                      |              |              |              | <b>AIC<sub>i</sub>: 346.53</b> | <b>AIC<sub>min</sub>: 342.42</b> |                     |
| <b>ADD versus HC</b>            | Whole brain          | 1.49         | 1.34         | 1.30         | Whole brain                    | Whole brain                      | 215.88              |
|                                 | Gray matter          | <b>29.69</b> | <b>4.96</b>  |              |                                |                                  |                     |
|                                 | Cortical gray matter | <b>31.61</b> |              |              |                                |                                  |                     |
|                                 | Frontal cortex       | 2.54         | 2.28         | 1.52         | Frontal cortex                 |                                  |                     |
|                                 | Parietal cortex      | 2.33         | 2.20         | 1.40         | Parietal cortex                | Parietal cortex                  | 226.07              |
|                                 | Temporal cortex      | 1.77         | 1.84         | 1.43         | Temporal cortex                |                                  |                     |
|                                 | Hippocampus, right   | 1.67         | 1.65         | 1.65         | Hippocampus, right             | Hippocampus, right               | 222.84              |
|                                 | Hippocampus, left    | 1.55         | 1.52         | 1.48         | Hippocampus, left              | Hippocampus, left                | 224.46              |
|                                 | Lateral ventricles   | 1.42         | 1.18         | 1.18         | Lateral ventricles             | Lateral ventricles               | 216.21              |
|                                 |                      |              |              |              | <b>AIC<sub>i</sub>: 218.45</b> | <b>AIC<sub>min</sub>: 215.35</b> |                     |
| <b>MCI versus SCD</b>           | Whole brain          | 2.07         | 1.78         | 1.71         | Whole brain                    |                                  |                     |
|                                 | Gray matter          | <b>47.95</b> | <b>8.63</b>  |              |                                |                                  |                     |

|                       |                      |              |             |      |                     |                       |        |
|-----------------------|----------------------|--------------|-------------|------|---------------------|-----------------------|--------|
|                       | Cortical gray matter | <b>53.50</b> |             |      |                     |                       |        |
|                       | Frontal cortex       | 4.45         | 3.92        | 1.81 | Frontal cortex      | Frontal cortex        | 397.41 |
|                       | Parietal cortex      | 2.82         | 2.80        | 1.99 | Parietal cortex     |                       |        |
|                       | Temporal cortex      | 2.42         | 2.28        | 1.81 | Temporal cortex     | Temporal cortex       | 398.45 |
|                       | Hippocampus, right   | 2.08         | 2.05        | 2.01 | Hippocampus, right  |                       |        |
|                       | Hippocampus, left    | 2.11         | 2.07        | 2.02 | Hippocampus, left   | Hippocampus, left     | 408.25 |
|                       | Lateral ventricles   | 2.09         | 1.44        | 1.47 | Lateral ventricles  |                       |        |
|                       |                      |              |             |      | <b>AICi: 402.24</b> | <b>AICmin: 396.99</b> |        |
| <b>ADD versus SCD</b> | Whole brain          | 1.74         | 1.54        | 1.52 | Whole brain         |                       |        |
|                       | Gray matter          | <b>27.13</b> | <b>8.15</b> |      |                     |                       |        |
|                       | Cortical gray matter | <b>32.16</b> |             |      |                     |                       |        |
|                       | Frontal cortex       | 3.49         | 2.87        | 1.59 | Frontal cortex      | Frontal cortex        | 277.97 |
|                       | Parietal cortex      | 3.01         | 2.98        | 1.68 | Parietal cortex     |                       |        |
|                       | Temporal cortex      | 2.59         | 2.48        | 1.71 | Temporal cortex     | Temporal cortex       | 277.64 |
|                       | Hippocampus, right   | 1.61         | 1.61        | 1.68 | Hippocampus, right  | Hippocampus, right    | 279.33 |
|                       | Hippocampus, left    | 1.59         | 1.59        | 1.54 | Hippocampus, left   | Hippocampus, left     | 287.58 |
|                       | Lateral ventricles   | 1.52         | 1.33        | 1.31 | Lateral ventricles  |                       |        |
|                       |                      |              |             |      | <b>AICi: 279.48</b> | <b>AICmin: 276.54</b> |        |
| <b>ADD versus MCI</b> | Whole brain          | 1.87         | 1.63        | 1.50 | Whole brain         |                       |        |
|                       | Gray matter          | <b>36.14</b> | <b>7.67</b> |      |                     |                       |        |
|                       | Cortical gray matter | <b>37.61</b> |             |      |                     |                       |        |
|                       | Frontal cortex       | 3.47         | 3.34        | 1.76 | Frontal cortex      |                       |        |
|                       | Parietal cortex      | 2.92         | 2.85        | 1.94 | Parietal cortex     | Parietal cortex       | 664.94 |
|                       | Temporal cortex      | 2.14         | 2.12        | 1.65 | Temporal cortex     |                       |        |
|                       | Hippocampus, right   | 1.94         | 1.93        | 1.92 | Hippocampus, right  | Hippocampus, right    | 664.83 |
|                       | Hippocampus, left    | 1.85         | 1.82        | 1.81 | Hippocampus, left   | Hippocampus, left     | 661.62 |
|                       | Lateral ventricles   | 1.78         | 1.42        | 1.42 | Lateral ventricles  | Lateral ventricles    | 661.54 |
|                       |                      |              |             |      | <b>AICi: 664.33</b> | <b>AICmin: 660.98</b> |        |

A stepwise backward regression model for age- and sex-adjusted brain volumes normalized for head size computed by **icobrain dm**. Disease stages: HC, cognitively healthy controls; SCD, subjective cognitive decline; MCI, mild cognitive impairment; ADD, Alzheimer's disease dementia. AIC, Akaike Information Criterion; Initial model, odel containing all individual predictors; VIF, Variance inflation factor; VIF-1, Variance inflation factors after exclusion of cortical gray matter from the initial model; VIF-2, Variance inflation factors after exclusion of cortical gray matter and gray matter from the initial model; Start model, Start model with corresponding AIC (AICi) for stepwise AIC analysis after removing variables causing multi-collinearity; Final model, Model containing the lowest AIC (AICmin); Stepwise AIC, Contribution of individual brain volumes to the model visualized as the change in AIC upon removal.

**Supplementary Table 9.** Stepwise backward regression model: contribution of separate brain volumes – FreeSurfer.

| <b>Disease Stage Comparison</b> | <b>Initial Model</b> | <b>VIF-1</b>  | <b>VIF-2</b> | <b>VIF-3</b>                   | <b>Start Model</b>               | <b>Final Model</b> | <b>Stepwise AIC</b> |
|---------------------------------|----------------------|---------------|--------------|--------------------------------|----------------------------------|--------------------|---------------------|
| <b>SCD versus HC</b>            | Whole brain          | 1.54          | 1.56         | 1.66                           | Whole brain                      | Whole brain        | 242.41              |
|                                 | Gray matter          | <b>253.89</b> | <b>13.75</b> |                                |                                  |                    |                     |
|                                 | Cortical gray matter | <b>236.92</b> |              |                                |                                  |                    |                     |
|                                 | Frontal cortex       | 4.18          | 4.12         | 3.29                           | Frontal cortex                   |                    |                     |
|                                 | Parietal cortex      | 4.83          | 4.77         | 2.96                           | Parietal cortex                  |                    |                     |
|                                 | Temporal cortex      | 4.15          | 4.09         | 2.80                           | Temporal cortex                  |                    |                     |
|                                 | Hippocampus, right   | 5.60          | 4.64         | 4.86                           | Hippocampus, right               |                    |                     |
|                                 | Hippocampus, left    | 4.66          | 4.41         | 4.63                           | Hippocampus, left                |                    |                     |
|                                 | Lateral ventricles   | 1.46          | 1.42         | 1.36                           | Lateral ventricles               | Lateral ventricles | 242.51              |
|                                 |                      |               |              | <b>AIC<sub>i</sub>: 241.87</b> | <b>AIC<sub>min</sub>: 235.31</b> |                    |                     |
| <b>MCI versus HC</b>            | Whole brain          | 1.89          | 1.79         | 1.87                           | Whole brain                      | Whole brain        | 387.62              |
|                                 | Gray matter          | <b>26.39</b>  | <b>18.12</b> |                                |                                  |                    |                     |
|                                 | Cortical gray matter | <b>11.79</b>  |              |                                |                                  |                    |                     |
|                                 | Frontal cortex       | 6.52          | 5.64         | 3.81                           | Frontal cortex                   | Frontal cortex     | 378.22              |
|                                 | Parietal cortex      | 5.76          | 5.37         | 3.50                           | Parietal cortex                  |                    |                     |
|                                 | Temporal cortex      | 5.54          | 5.08         | 2.66                           | Temporal cortex                  | Temporal cortex    | 389.96              |
|                                 | Hippocampus, right   | 3.44          | 3.07         | 3.10                           | Hippocampus, right               |                    |                     |
|                                 | Hippocampus, left    | 3.65          | 3.28         | 3.39                           | Hippocampus, left                | Hippocampus, left  | 384.77              |
|                                 | Lateral ventricles   | 1.12          | 1.12         | 1.10                           | Lateral ventricles               | Lateral ventricles | 383.16              |
|                                 |                      |               |              | <b>AIC<sub>i</sub>: 378.64</b> | <b>AIC<sub>min</sub>: 375.83</b> |                    |                     |
| <b>ADD versus HC</b>            | Whole brain          | 1.89          | 1.75         | 1.77                           | Whole brain                      | Whole brain        | 283.71              |
|                                 | Gray matter          | <b>327.20</b> | <b>18.13</b> |                                |                                  |                    |                     |
|                                 | Cortical gray matter | <b>317.76</b> |              |                                |                                  |                    |                     |
|                                 | Frontal cortex       | 6.09          | 6.05         | 3.35                           | Frontal cortex                   | Frontal cortex     | 278.20              |
|                                 | Parietal cortex      | 4.56          | 4.52         | 2.98                           | Parietal cortex                  |                    |                     |
|                                 | Temporal cortex      | 4.76          | 4.72         | 2.32                           | Temporal cortex                  | Temporal cortex    | 300.48              |
|                                 | Hippocampus, right   | 3.75          | 3.37         | 3.33                           | Hippocampus, right               | Hippocampus, right | 286.71              |
|                                 | Hippocampus, left    | 3.42          | 3.29         | 3.27                           | Hippocampus, left                |                    |                     |
|                                 | Lateral ventricles   | 1.09          | 1.09         | 1.08                           | Lateral ventricles               | Lateral ventricles | 289.28              |
|                                 |                      |               |              | <b>AIC<sub>i</sub>: 279.18</b> | <b>AIC<sub>min</sub>: 275.29</b> |                    |                     |
| <b>MCI versus SCD</b>           | Whole brain          | 1.86          | 1.72         | 1.66                           | Whole brain                      | Whole brain        |                     |
|                                 | Gray matter          | <b>317.08</b> | <b>20.76</b> |                                |                                  |                    |                     |

|                       |                      |               |              |      |                     |                       |        |
|-----------------------|----------------------|---------------|--------------|------|---------------------|-----------------------|--------|
|                       | Cortical gray matter | <b>323.07</b> |              |      |                     |                       |        |
|                       | Frontal cortex       | 6.93          | 6.59         | 3.85 | Frontal cortex      |                       |        |
|                       | Parietal cortex      | 6.01          | 5.66         | 3.85 | Parietal cortex     | Parietal cortex       | 390.56 |
|                       | Temporal cortex      | 5.66          | 5.24         | 2.66 | Temporal cortex     | Temporal cortex       | 385.64 |
|                       | Hippocampus, right   | 3.72          | 3.39         | 3.24 | Hippocampus, right  |                       |        |
|                       | Hippocampus, left    | 3.63          | 3.31         | 3.25 | Hippocampus, left   | Hippocampus, left     | 413.56 |
|                       | Lateral ventricles   | 1.20          | 1.17         | 1.16 | Lateral ventricles  |                       |        |
|                       |                      |               |              |      | <b>AICi: 390.55</b> | <b>AICmin: 384.26</b> |        |
|                       | Whole brain          | 1.83          | 1.66         | 1.64 | Whole brain         |                       |        |
|                       | Gray matter          | <b>297.17</b> | <b>19.32</b> |      |                     |                       |        |
|                       | Cortical gray matter | <b>302.70</b> |              |      |                     |                       |        |
| <b>ADD versus SCD</b> | Frontal cortex       | 7.07          | 6.88         | 3.44 | Frontal cortex      |                       |        |
|                       | Parietal cortex      | 5.34          | 5.14         | 3.55 | Parietal cortex     | Parietal cortex       | 297.26 |
|                       | Temporal cortex      | 4.57          | 4.34         | 2.35 | Temporal cortex     | Temporal cortex       | 337.19 |
|                       | Hippocampus, right   | 3.44          | 3.21         | 3.09 | Hippocampus, right  | Hippocampus, right    | 295.72 |
|                       | Hippocampus, left    | 3.29          | 3.18         | 3.14 | Hippocampus, left   |                       |        |
|                       | Lateral ventricles   | 1.18          | 1.18         | 1.15 | Lateral ventricles  |                       |        |
|                       |                      |               |              |      | <b>AICi: 294.76</b> | <b>AICmin: 288.70</b> |        |
|                       | Whole brain          | 1.53          | 1.34         | 1.34 | Whole brain         |                       |        |
|                       | Gray matter          | <b>336.98</b> | <b>19.25</b> |      |                     |                       |        |
|                       | Cortical gray matter | <b>362.94</b> |              |      |                     |                       |        |
| <b>ADD versus MCI</b> | Frontal cortex       | 6.88          | 6.62         | 3.47 | Frontal cortex      |                       |        |
|                       | Parietal cortex      | 4.96          | 4.69         | 3.28 | Parietal cortex     | Parietal cortex       | 684.37 |
|                       | Temporal cortex      | 5.61          | 5.42         | 2.73 | Temporal cortex     | Temporal cortex       | 690.07 |
|                       | Hippocampus, right   | 3.10          | 2.81         | 2.76 | Hippocampus, right  | Hippocampus, right    | 684.11 |
|                       | Hippocampus, left    | 3.06          | 2.76         | 2.75 | Hippocampus, left   |                       |        |
|                       | Lateral ventricles   | 1.13          | 1.13         | 1.11 | Lateral ventricles  | Lateral ventricles    | 690.12 |
|                       |                      |               |              |      | <b>AICi: 686.17</b> | <b>AICmin: 683.24</b> |        |

A stepwise backward regression model for age- and sex-adjusted brain volumes normalized for head size computed by FreeSurfer. Disease stages: HC, cognitively healthy controls; SCD, subjective cognitive decline; MCI, mild cognitive impairment; ADD, Alzheimer's disease dementia. AIC, Akaike Information Criterion; Initial model, Model containing all individual predictors; VIF, Variance inflation factor; VIF-1, Variance inflation factors after exclusion of cortical gray matter from the initial model; VIF-2, Variance inflation factors after exclusion of cortical gray matter and gray matter from the initial model; Start model, Start model with corresponding AIC (AICi) for stepwise AIC analysis after removing variables causing multi-collinearity; Final model, Model containing the lowest AIC (AICmin); Stepwise AIC, Contribution of individual brain volumes to the model visualized as the change in AIC upon removal.
